# Supplementary material for: Dual ligand based 3D Eu(iii) MOF as a multifunctional sensor for trace amounts of NACs, Cr3+ and Hg2+ in aqueous medium: synthesis, crystal structure and latent fingerprint detection
Source: Royal Society of Chemistry journal article supplement (doi:10.1039/d4ce00621f), 2024-01-01
Supplement: d4ce00621f1.pdf [file d4ce00621f1.pdf]

## Table of Contents

### CONTENTS

1. X-Ray Crystal structures of **Cj-3** (S1-S2)
2. FTIR spectrum of **Cj-3** (S3)
3. Experimental and simulated PXRD Patterns of **Cj-3** and recycled samples of **Cj-3** (S4)
4. Emission spectra of H<sub>2</sub>NITA and H<sub>2</sub>Pyzdc (S5)
5. Emission spectra of **Cj-3** in different solvents (S6)
6. Effect of pH on the emission spectra of **Cj-3** (S7)
7. PXRD response of **Cj-3** at different pH (2-8) (S8)
8. Recyclability of **Cj-3** after four cycles of sensing for *p*-NA and *o*-NA (S9)
9. Energy profile diagram of the 2, 3 Pyzdc ligand and NACs with calculated HOMO and LUMO energies by DFT. (S10)
10. UV-Vis Absorption spectra of metals ions (S11)
11. Variation in luminescence intensity of **Cj-3** upon incremental addition of Cr<sup>3+</sup> ions dispersed in aqueous solutions with 1M HCl (0 μl -100 μl) (S12)
12. Variation in luminescence intensity of **Cj-3** upon incremental addition of Hg<sup>2+</sup> ions dispersed in aqueous solutions with 1M HCl (0 μl -100 μl) (S13)
13. Crystallographic Information (Tables S1-S4)

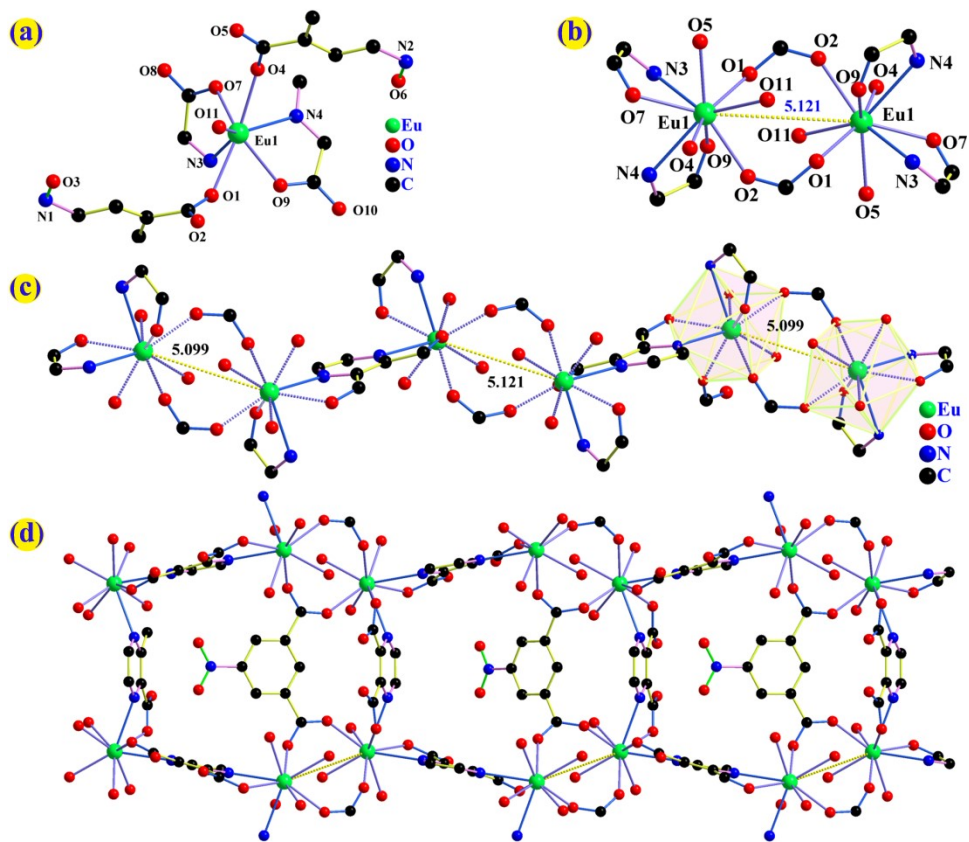

**Figure S1.** Crystal structure of Cj-3: (a) asymmetric unit; (b) dinuclear  $\text{Eu}_2\text{N}_2\text{O}_{14}$  SBU; (c) representation of zig-zag rod shaped linear extension of paddle shaped SBU; (d) 2D extension of SBUs.

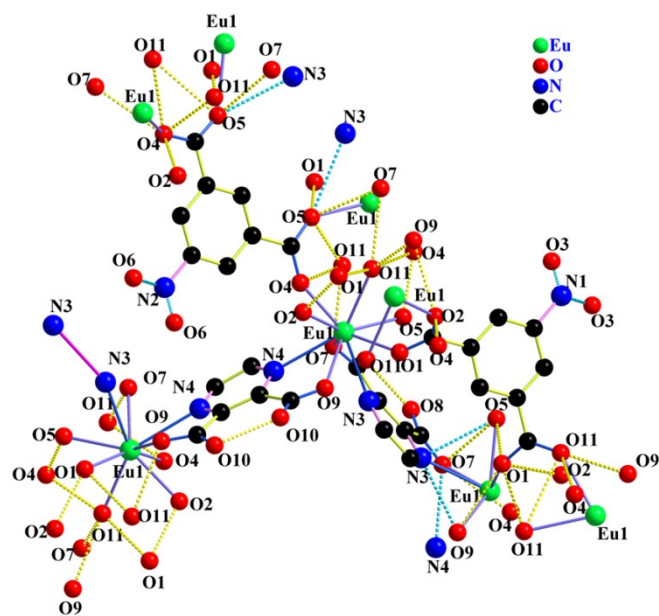

**Figure S2.** Hydrogen bonding positions in Cj-3

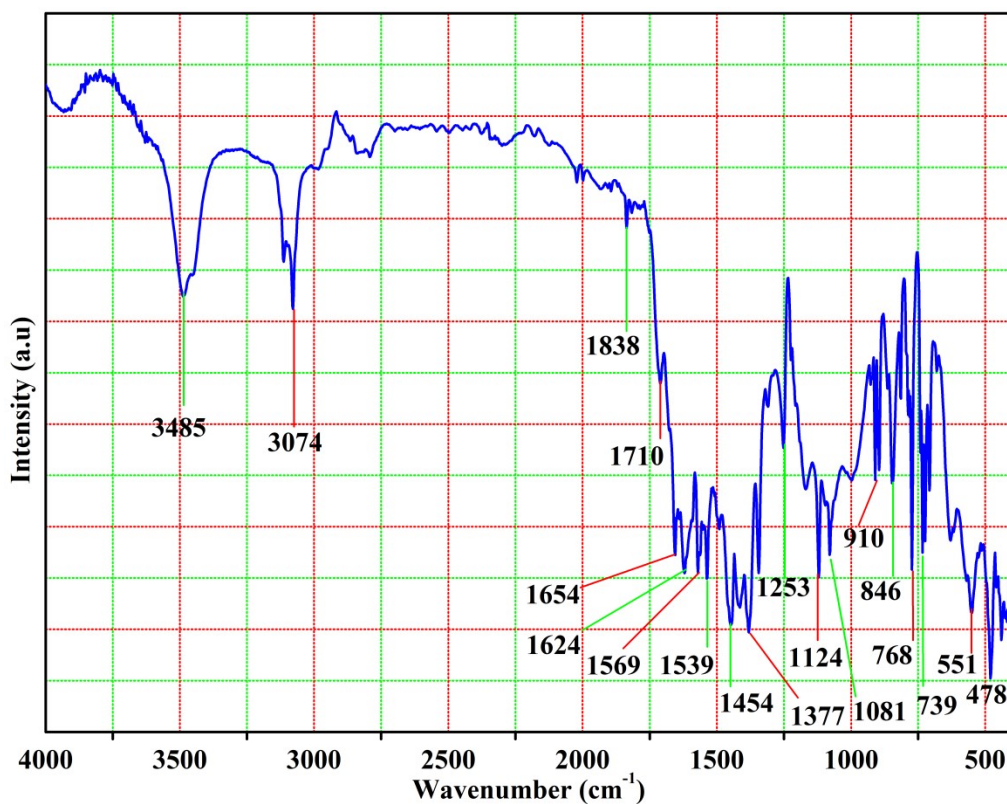

Figure S3. FTIR spectrum of Cj-3.

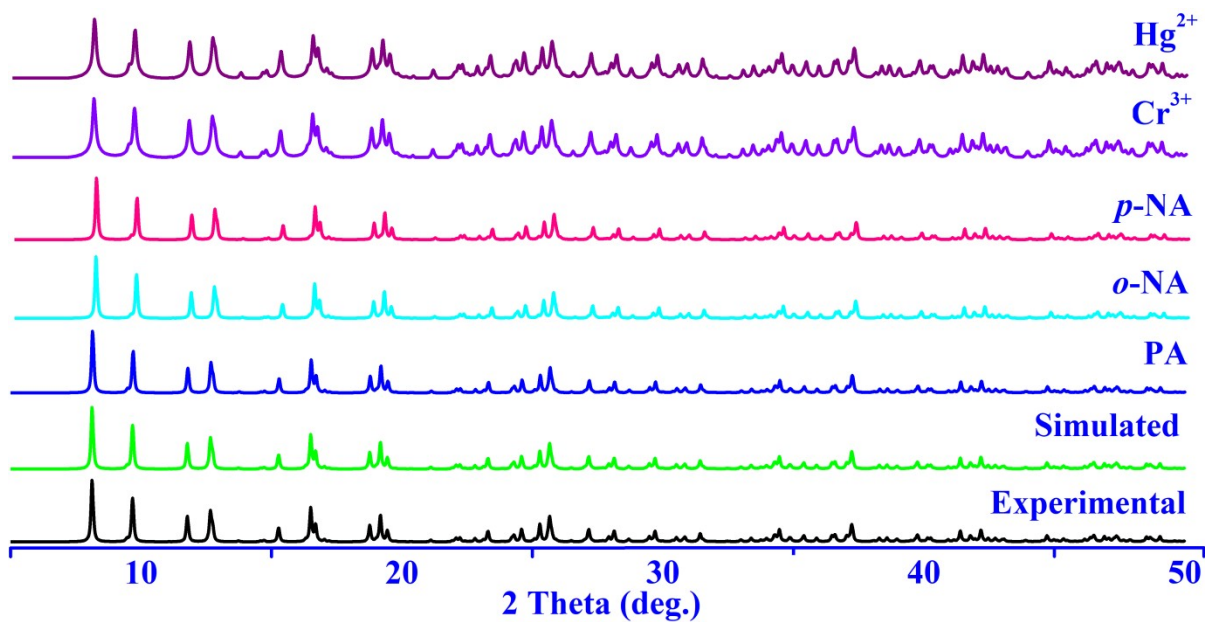

Figure S4. Experimental and simulated PXRD Patterns of Cj-3, along with the PXRD response of recycled Cj-3 after addition of PA, *p*-NA, *o*-NA, Hg<sup>2+</sup> and Cr<sup>3+</sup>.

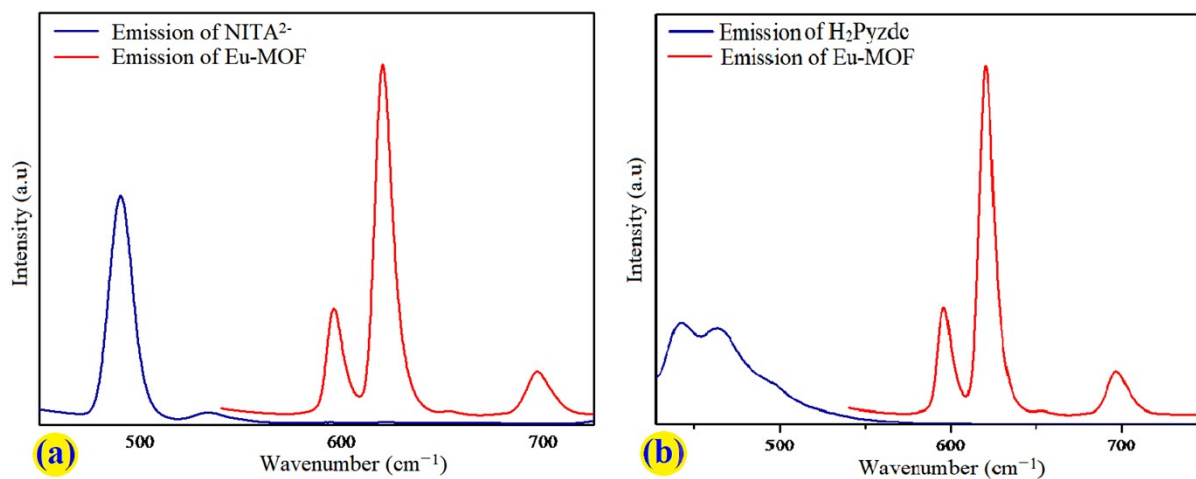

**Figure S5.** Emission spectra of Eu-MOF and ligands; (a) Nitroisophthalic acid and (b) 2,3 Pyrazine dicarboxylic acid.

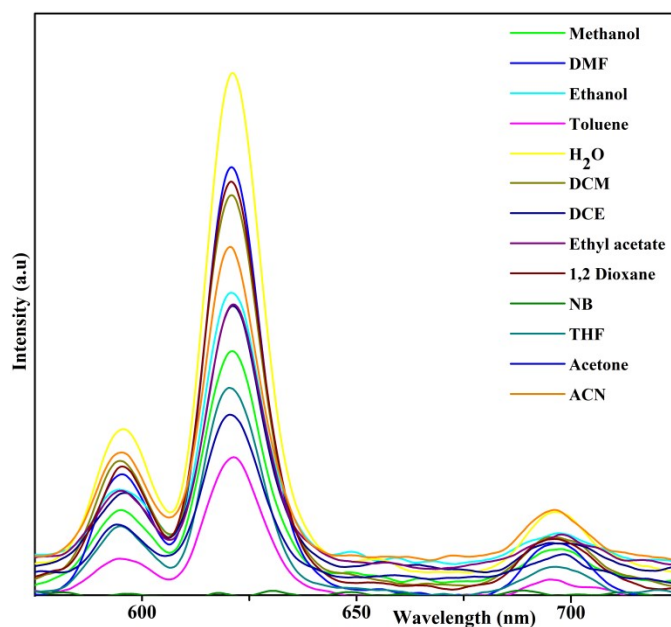

**Figure S6.** Emission spectra of Cj-3 in different solvents.

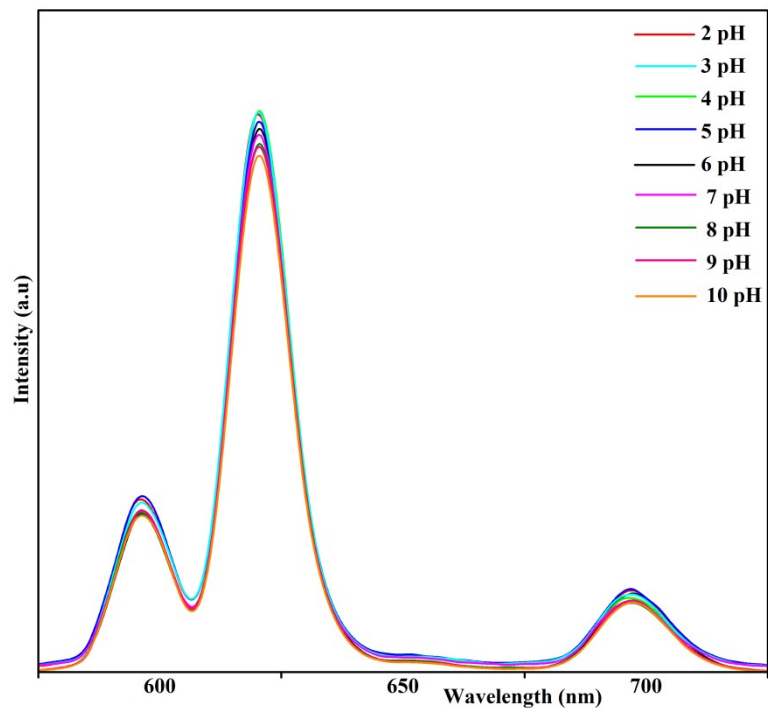

Figure S7. Effect of pH on the emission spectra of Cj-3

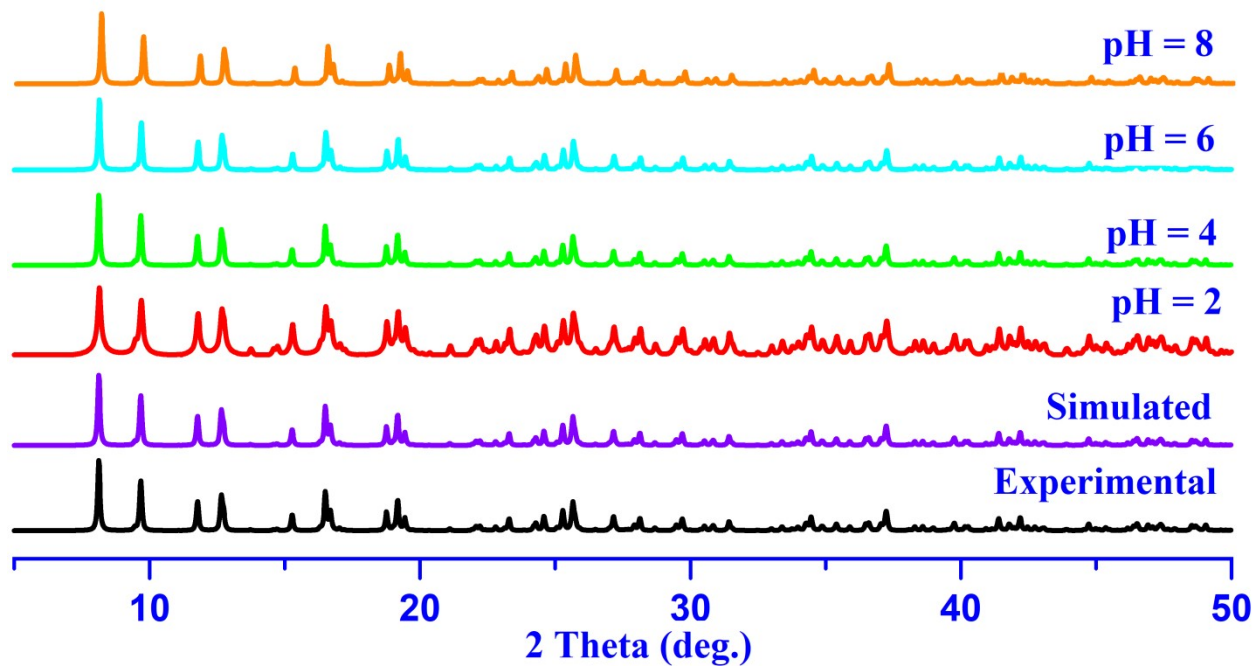

Figure S8. PXRD response of Cj-3 at different pH (2-8)

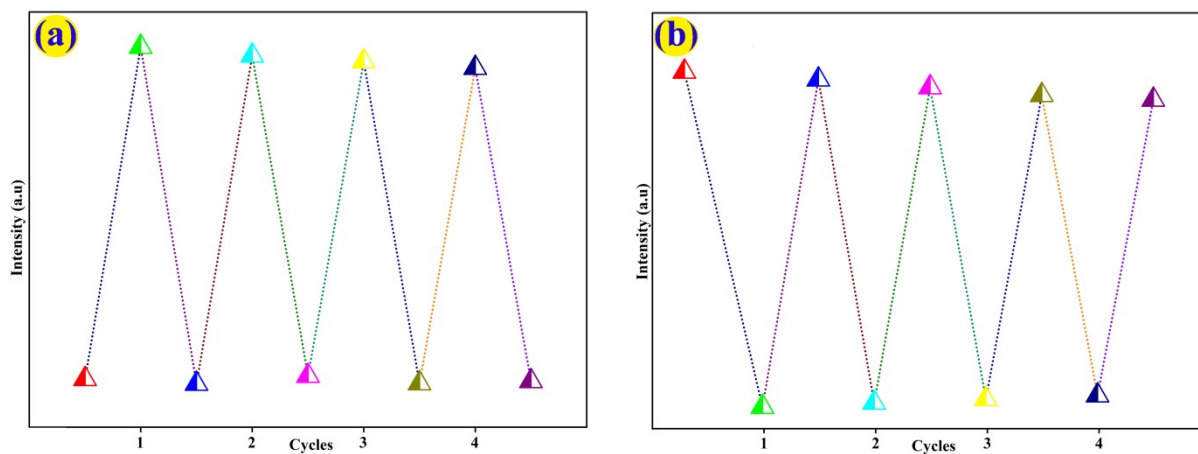

**Figure S9:** Recyclability of Cj-3 after four cycles of sensing for *p*-NA and *o*-NA

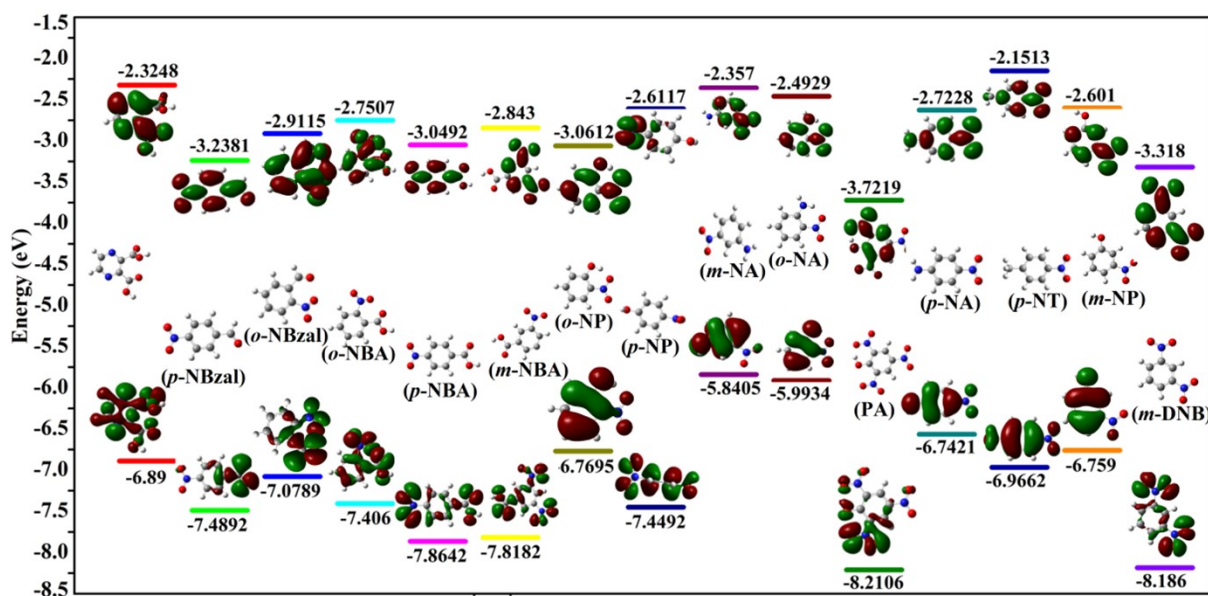

**Figure S10:** Energy profile diagram of the 2, 3 Pyzdc ligand and NACs with calculated HOMO and LUMO energies by DFT.

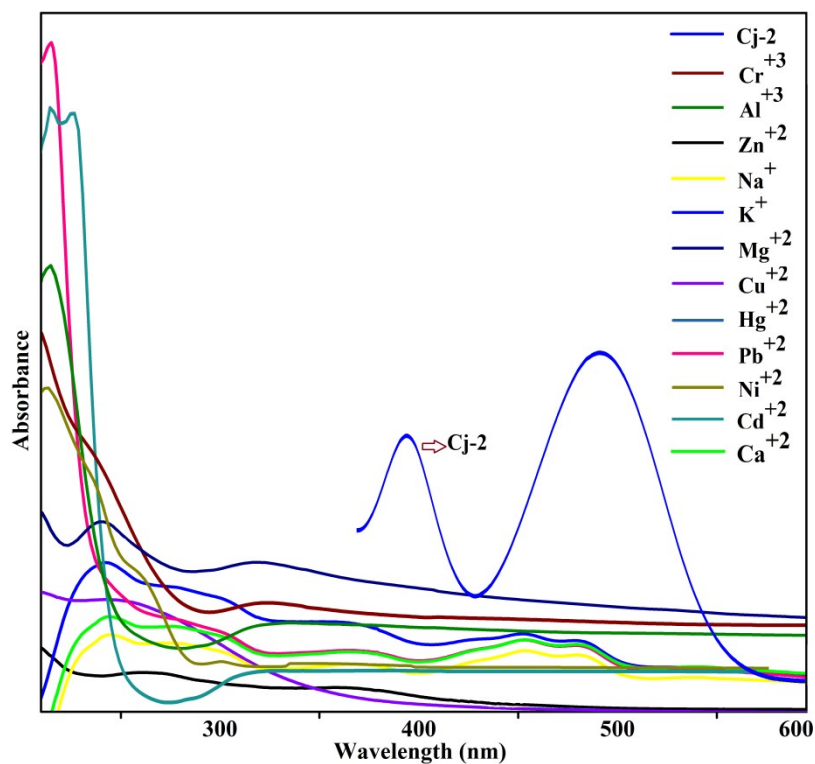

**Figure S11.** UV-Vis Absorption spectra of different metals ions and excitation spectra of Cj-3

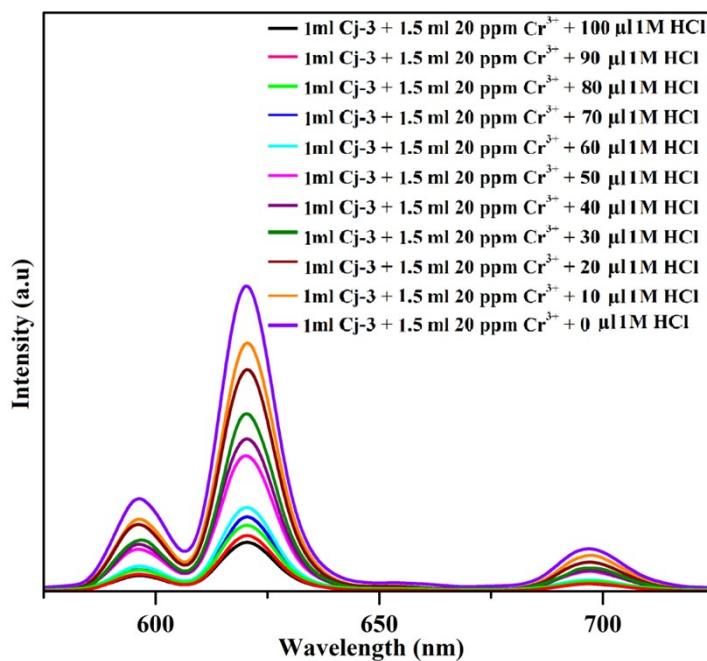

**Figure S12.** Variation in luminescence intensity of Cj-3 upon incremental addition of Cr<sup>3+</sup> ions dispersed in aqueous solutions with 1M HCl (0 μl -100 μl).

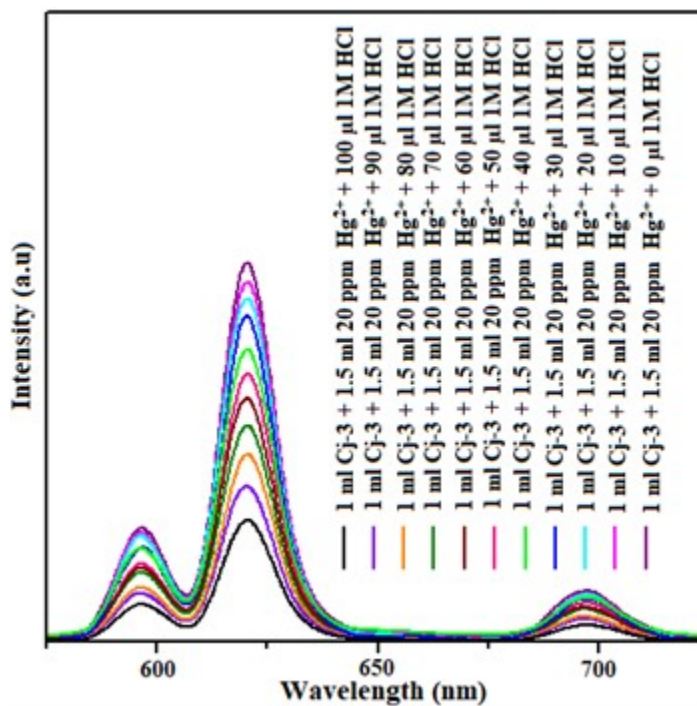

**Figure S13.** Variation in luminescence intensity of **Cj-3** upon incremental addition of  $\text{Hg}^{2+}$  ions dispersed in aqueous solutions with 1M HCl (0  $\mu\text{l}$  -100  $\mu\text{l}$ ).



## Crystallographic Information (Tables)

**Table S1: Crystal data for Cj-3**

|                                                                                                      |                                         |
|------------------------------------------------------------------------------------------------------|-----------------------------------------|
| Crystal data                                                                                         | Cj-3                                    |
| Empirical formula                                                                                    | $C_{14}H_8EuN_3O_{11}$                  |
| CCDC                                                                                                 | 2356631                                 |
| Formula weight                                                                                       | 546.20                                  |
| Crystal system<br>space group                                                                        | orthorhombic<br>Pbcm                    |
| Temperature (K)                                                                                      | 293                                     |
| $a$ (Å)<br>$b$ (Å)<br>$c$ (Å)                                                                        | 7.9885(4)<br>21.6907(12)<br>18.2297(10) |
| $\alpha$ (deg°)<br>$\beta$ ( deg °)<br>$\gamma$ ( deg °)                                             | 90<br>90<br>90                          |
| Volume (Å <sup>3</sup> )                                                                             | 33158.8(3)                              |
| $Z$                                                                                                  | 8                                       |
| Radiation type                                                                                       | Mo K $\alpha$ ( $\lambda = 0.71073$ )   |
| $\mu$ (mm <sup>-1</sup> )                                                                            | 14.048                                  |
| Crystal size (mm <sup>3</sup> )                                                                      | 3.037 × 0.21 × 0.14                     |
| $T_{\min}$ , $T_{\max}$                                                                              | 0.300, 1.000                            |
| Reflections collected                                                                                | 27445                                   |
| $R_{\text{int}}$                                                                                     | 0.1207                                  |
| Data/restraints/parameters                                                                           | 2859/0/272                              |
| $R[F^2 > 2\sigma(F^2)]$ , $wR(F^2)$ , $S$                                                            | 0.0400, 0.0977, 1.05                    |
| $\Delta\rho_{\max}$ , $\Delta\rho_{\min}$ (e Å <sup>-3</sup> )<br>Goodness-of-fit on $F^2$<br>F(000) | 1.76, -2.01<br>1.052<br>2113.2          |

**Table S2: Hydrogen-bond geometry (Å, °) for Cj-3**

| Type  | Donor ---<br>H...Acceptor    | D - H | H...A | D...A    | D - H...A |
|-------|------------------------------|-------|-------|----------|-----------|
| Intra | O8-H8 ...O8 <sup>i</sup>     | 0.82  | 1.58  | 2.399(5) | 176       |
| Intra | O11-H11A...O4 <sup>ii</sup>  | 0.85  | 2.12  | 2.919(4) | 157       |
| Intra | O11-H11A...O5 <sup>ii</sup>  | 0.85  | 2.52  | 2.863(5) | 105       |
| Intra | O11-H11A...O7 <sup>ii</sup>  | 0.85  | 2.4   | 2.868(5) | 115       |
| Intra | O11-H11B...O2                | 0.85  | 2.53  | 3.310(4) | 153       |
| Intra | O11-H11B...O1 <sup>iii</sup> | 0.85  | 2.47  | 2.786(4) | 103       |
| Intra | O11-H11B...O9 <sup>iii</sup> | 0.85  | 2.25  | 2.944(5) | 139       |
|       | C13-H13...O8 <sup>iv</sup>   | 0.93  | 2.52  | 3.364(6) | 150       |
| Intra | C13-H13...O9                 | 0.93  | 2.36  | 2.931(6) | 120       |
| Intra | C16-H16...O7                 | 0.93  | 2.43  | 2.936(6) | 114       |
|       | C16-H16...O10 <sup>v</sup>   | 0.93  | 2.54  | 3.377(6) | 150       |

Symmetry code(s): (i)  $x, y, 3/2-z$  (ii)  $1-x, 1-y, 1-z$  (iii)  $-x, 1-y, 1-z$  (iv)  $-1+x, y, z$  (v)  $1+x, y, z$

**Table S3: Selected geometric parameters (Å) for Cj-3**

|                     |           |                      |           |
|---------------------|-----------|----------------------|-----------|
| Eu1—O9              | 2.450 (3) | Eu1—O5 <sup>ii</sup> | 2.417 (3) |
| Eu1—O11             | 2.425 (4) | Eu1—O1               | 2.380 (3) |
| Eu1—O4              | 2.358 (3) | Eu1—N3               | 2.635 (4) |
| Eu1—O2 <sup>i</sup> | 2.414 (3) | Eu1—N4               | 2.693 (4) |
| Eu1—O7              | 2.467 (3) |                      |           |

Symmetry code(s): (i)  $-x, -y+1, -z+1$ ; (ii)  $-x+1, -y+1, -z+1$ ; (iii)  $x, y, -z+1/2$ ; (iv)  $x, y, -z+3/2$ ; (v)  $x, -y+1/2, -z+1$ .

**Table S4: Selected geometric parameters (°) for Cj-3**

|                                       |             |                         |             |
|---------------------------------------|-------------|-------------------------|-------------|
| O11—Eu1—O9                            | 123.70 (10) | O1—Eu1—O2 <sup>i</sup>  | 94.20 (11)  |
| O4—Eu1—O9                             | 126.72 (11) | O1—Eu1—O7               | 127.18 (11) |
| O4—Eu1—O11                            | 76.53 (12)  | O1—Eu1—O5 <sup>ii</sup> | 75.03 (11)  |
| O2 <sup>i</sup> —Eu1—O9               | 66.12 (11)  | N3—Eu1—O9               | 69.67 (11)  |
| O2 <sup>i</sup> —Eu1—O11              | 73.83 (12)  | N3—Eu1—O11              | 139.19 (13) |
| O2 <sup>i</sup> —Eu1—O4               | 76.71 (13)  | N3—Eu1—O4               | 129.84 (11) |
| O7—Eu1—O9                             | 113.67 (11) | N3—Eu1—O2 <sup>i</sup>  | 135.53 (11) |
| O7—Eu1—O11                            | 122.62 (10) | N3—Eu1—O7               | 60.36 (10)  |
| O7—Eu1—O4                             | 70.57 (11)  | N3—Eu1—O5 <sup>ii</sup> | 73.16 (11)  |
| O7—Eu1—O2 <sup>i</sup>                | 136.90 (11) | N3—Eu1—O1               | 74.22 (11)  |
| O5 <sup>ii</sup> —Eu1—O9              | 133.78 (10) | N4—Eu1—O9               | 60.12 (11)  |
| O5 <sup>ii</sup> —Eu1—O11             | 72.43 (12)  | N4—Eu1—O11              | 142.66 (14) |
| O5 <sup>ii</sup> —Eu1—O4              | 98.14 (11)  | N4—Eu1—O4               | 75.29 (12)  |
| O5 <sup>ii</sup> —Eu1—O2 <sup>i</sup> | 146.12 (11) | N4—Eu1—O2 <sup>i</sup>  | 76.23 (12)  |
| O5 <sup>ii</sup> —Eu1—O7              | 67.51 (11)  | N4—Eu1—O7               | 68.98 (11)  |
| O1—Eu1—O9                             | 69.24 (11)  | N4—Eu1—O5 <sup>ii</sup> | 135.59 (12) |
| O1—Eu1—O11                            | 76.27 (11)  | N4—Eu1—O1               | 128.05 (11) |
| O1—Eu1—O4                             | 152.75 (11) | N4—Eu1—N3               | 78.15 (13)  |

Symmetry code(s): (i)  $-x, -y+1, -z+1$ ; (ii)  $-x+1, -y+1, -z+1$ ; (iii)  $x, y, -z+1/2$ ; (iv)  $x, y, -z+3/2$ ; (v)  $x, -y+1/2, -z+1$ .
